# Supplementary material for: An injectable nanocomposite hydrogel co-constructed with gold nanorods and paclitaxel-loaded nanoparticles for local chemo-photothermal synergetic cancer therapy
Source: Royal Society of Chemistry journal article supplement (doi:10.1039/c9tb00120d), 2019-01-01
Supplement: c9tb00120d1.pdf [file c9tb00120d1.pdf]

# Injectable Nanocomposite Hydrogel Co-Constructed by Gold Nanorods and Paclitaxel-Loaded Nanoparticles for Local Chemo-Photothermal Synergetic Cancer Therapy

Meiyan Liu,<sup>a,b</sup> Pingsheng Huang,<sup>\*b</sup> Weiwei Wang,<sup>b</sup> Zujian Feng,<sup>a</sup> Jianhua Zhang,<sup>a</sup> Liandong Deng,<sup>a</sup> Anjie Dong<sup>\*a,c</sup>

<sup>a</sup> Department of Polymer Science and Engineering, Key Laboratory of Systems Bioengineering (Ministry of Education), School of Chemical Engineering and Technology, Tianjin University, Tianjin 300072, China

<sup>b</sup> Tianjin Key Laboratory of Biomaterial Research, Institute of Biomedical Engineering, Chinese Academy of Medical Sciences and Peking Union Medical College, Tianjin 300192, China

<sup>c</sup> Collaborative Innovation Center of Chemical Science and Engineering (Tianjin), Tianjin 300072, China

## Corresponding Author

\*E-mail: sheng1989.2008@163.com; ajdong@tju.edu.cn

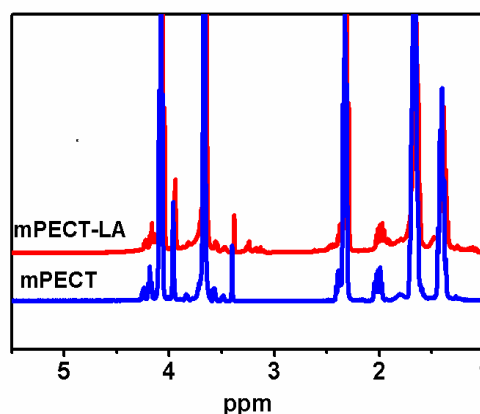

Fig. S1. <sup>1</sup>H NMR spectra of mPECT and mPECT-LA (modified mPECT with lipoic acid).

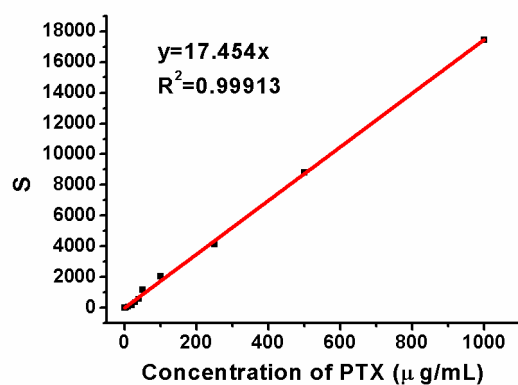

Fig. S2. The standard curve of the PTX measured through HPLC.

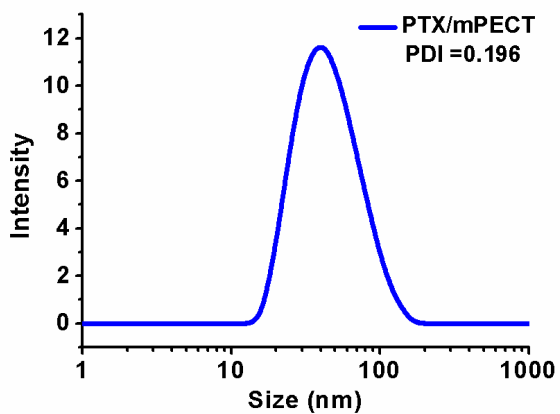

Fig. S3. The size distribution of PTX/mPLECT nanoparticles determined by DLS.

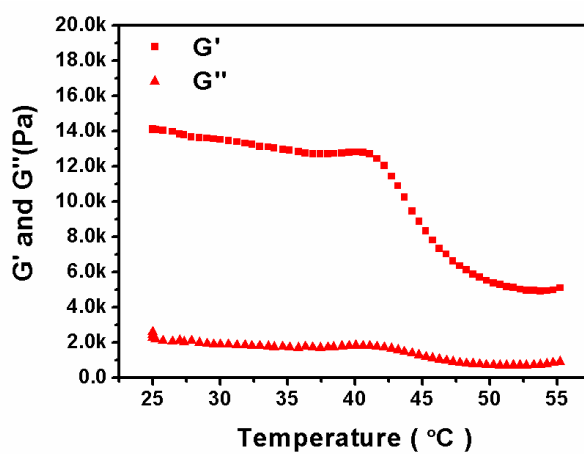

Fig. S4. Influence of temperature on the rheological behavior of AuNRmPLECT<sup>gel</sup>. (The temperature was from 25  $^{\circ}\text{C}$  to 55  $^{\circ}\text{C}$ ).

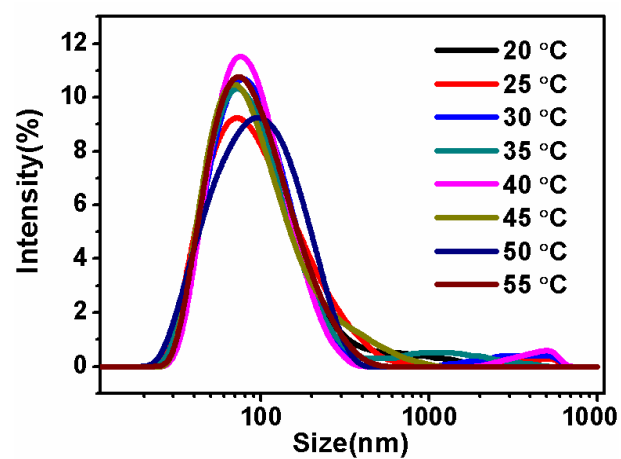

Fig. S5. The size distribution of mPECT nanoparticles determined by DLS (The temperature was from 20 °C to 55 °C).

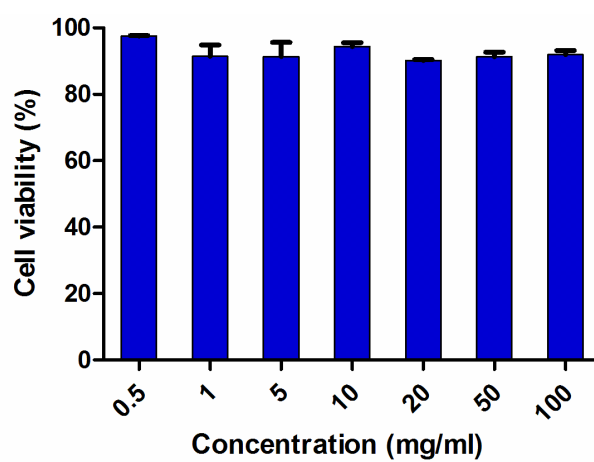

Fig. S6. CCK-8 assay results confirming the in vitro biocompatibility of mPECT<sup>gel</sup> diluent against 4T1 cells for 24 h.

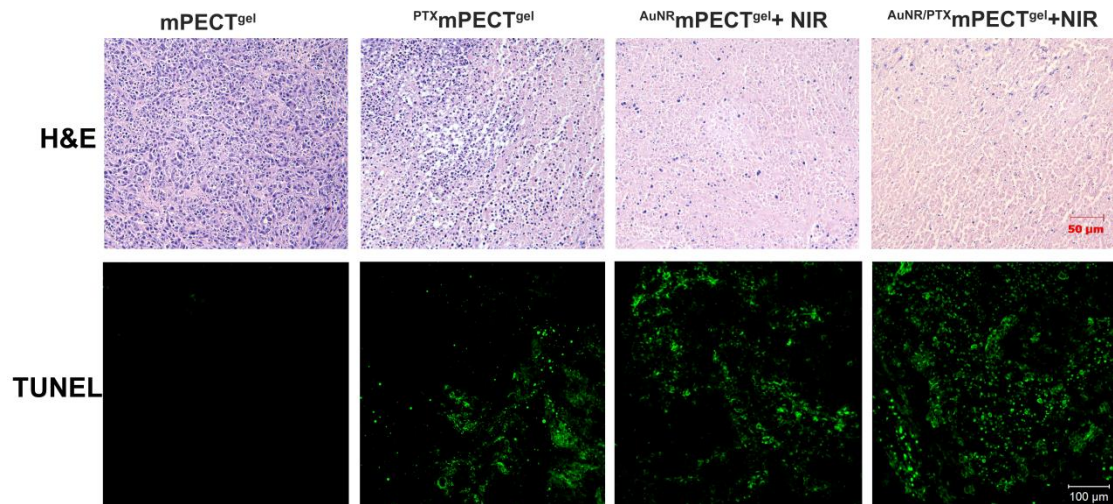

Fig. S7. Micrographs of tumor slices after H&E (upper) or TUNEL (bottom) staining collected at last day after various treatments in *in vivo* inhibition of tumor growth assay.

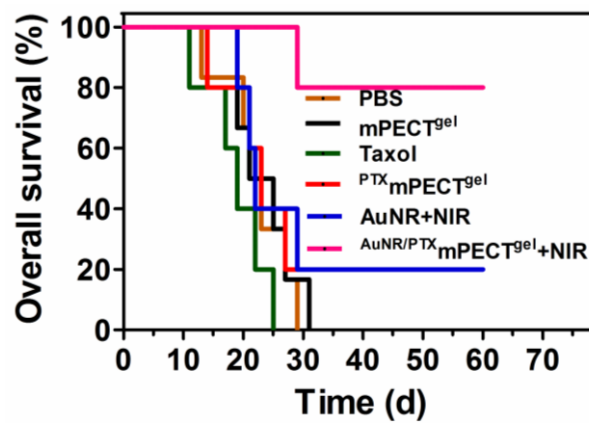

Fig. S8. Overall survival of the tumor resection mice of each groups (n = 6).
